# Supplementary material for: Effect of steric bulk on the absolute reactivity of allene oxides
Source: Royal Society of Chemistry journal article supplement (doi:10.1039/b910887d), 2009-01-01

Supporting Information

## Effect of Steric Bulk on the Absolute Reactivity of Allene Oxides.

Mark W. Konecny,<sup>a</sup> Norman P. Schepp<sup>\*a</sup>

<sup>a</sup>Department of Chemistry, Dalhousie University, Halifax, Nova Scotia, Canada, B3H 4J3

Table of Contents

|                                                                                                                             |     |
|-----------------------------------------------------------------------------------------------------------------------------|-----|
| <sup>1</sup> H-NMR spectra of 9-(1-trimethylsilyl-1-propenyl)-9 <i>H</i> -fluoren-9-ol .....                                | S2  |
| <sup>13</sup> C-NMR spectra of 9-(1-trimethylsilyl-1-propenyl)-9 <i>H</i> -fluoren-9-ol .....                               | S3  |
| <sup>1</sup> H-NMR spectra of 9-(1-trimethylsilyl-1,2-epoxyprop-1-yl)-9 <i>H</i> -fluoren-9-ol <b>1b</b> .....              | S4  |
| <sup>13</sup> C-NMR spectra of 9-(1-trimethylsilyl-1,2-epoxyprop-1-yl)-9 <i>H</i> -fluoren-9-ol <b>1b</b> .....             | S5  |
| <sup>1</sup> H-NMR spectra of 9-(1-trimethylsilyl-1-hexenyl)-9 <i>H</i> -fluoren-9-ol.....                                  | S6  |
| <sup>13</sup> C-NMR spectra of 9-(1-trimethylsilyl-1-hexenyl)-9 <i>H</i> -fluoren-9-ol.....                                 | S7  |
| <sup>1</sup> H-NMR spectra of 9-(1-trimethylsilyl-1,2-epoxyhex-1-yl)-9 <i>H</i> -fluoren-9-ol. <b>1c</b> .....              | S8  |
| <sup>13</sup> C-NMR spectra of 9-(1-trimethylsilyl-1,2-epoxyhex-1-yl)-9 <i>H</i> -fluoren-9-ol. <b>1c</b> .....             | S9  |
| <sup>1</sup> H-NMR spectra of 9-(3,3-dimethyl-1-trimethylsilyl-1-butenyl)-9 <i>H</i> -fluoren-9-ol.....                     | S10 |
| <sup>13</sup> C-NMR spectra of 9-(3,3-dimethyl-1-trimethylsilyl-1-butenyl)-9 <i>H</i> -fluoren-9-ol.....                    | S11 |
| <sup>1</sup> H-NMR spectra of 9-(3,3-dimethyl-1-trimethylsilyl-1,2-epoxybut-1-yl)-9 <i>H</i> -fluoren-9-ol <b>1d</b> .....  | S12 |
| <sup>13</sup> C-NMR spectra of 9-(3,3-dimethyl-1-trimethylsilyl-1,2-epoxybut-1-yl)-9 <i>H</i> -fluoren-9-ol <b>1d</b> ..... | S13 |

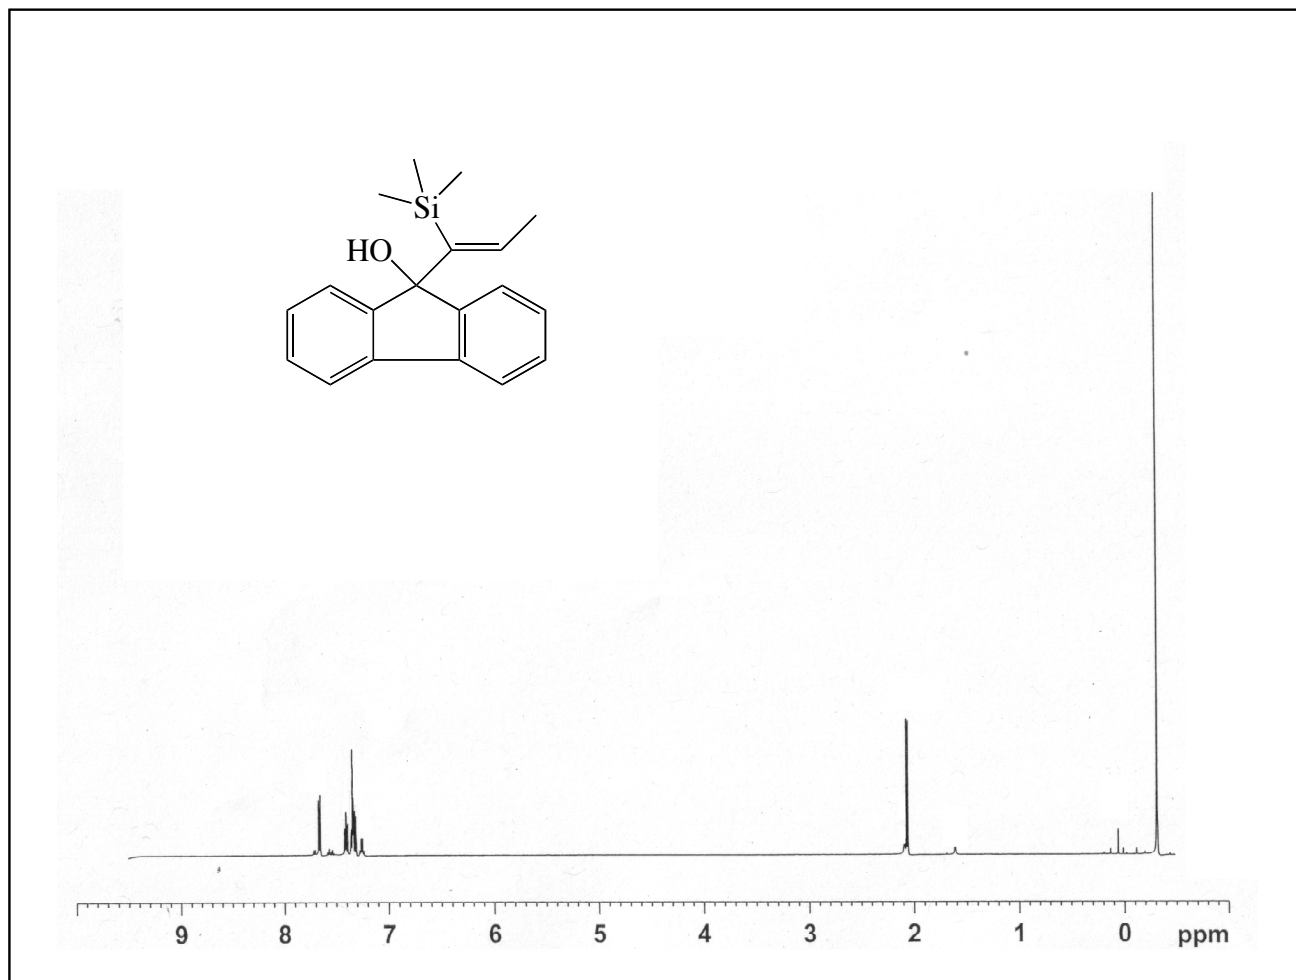

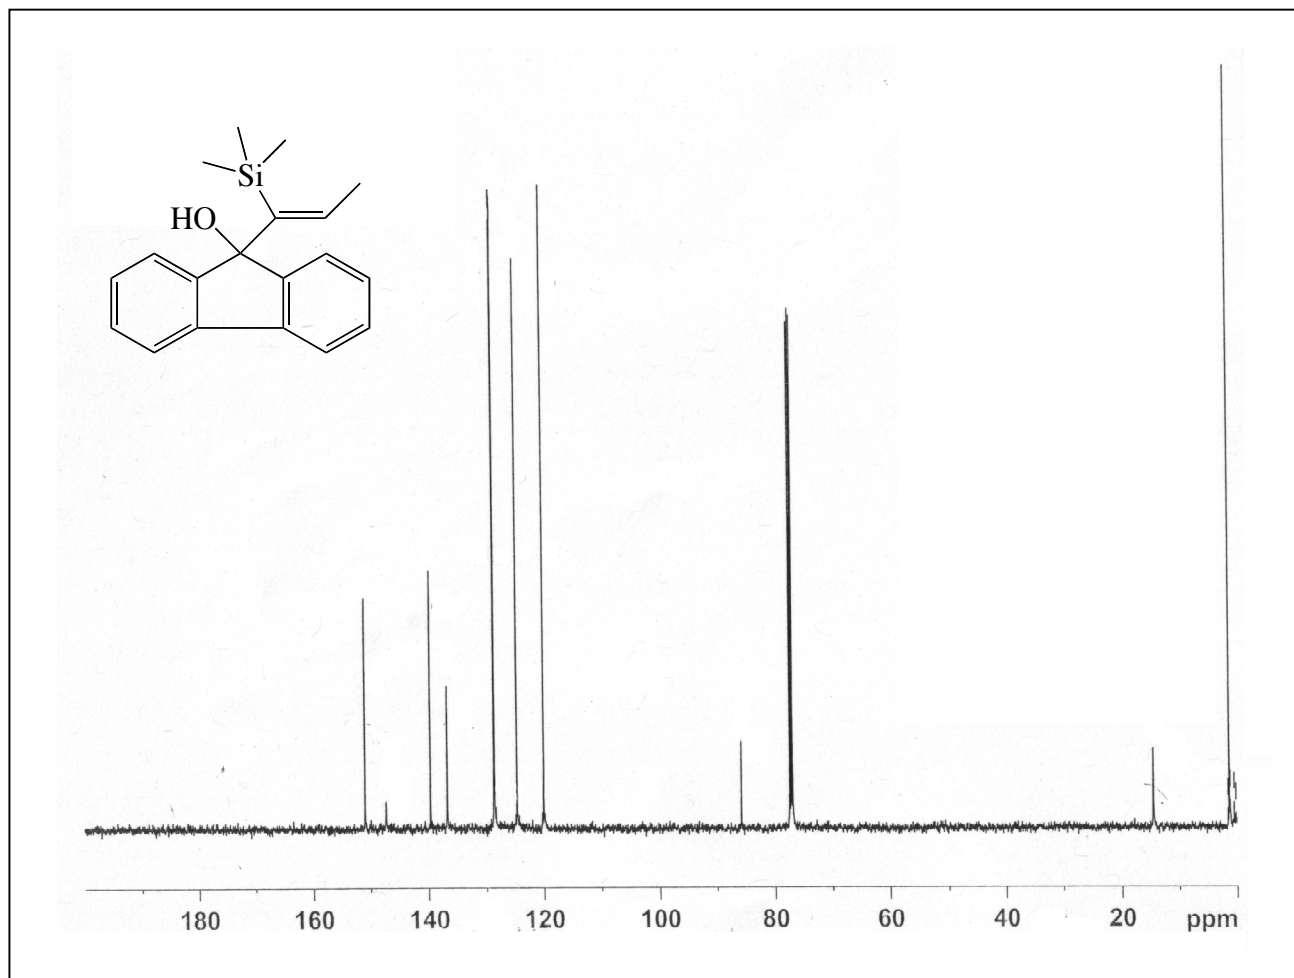

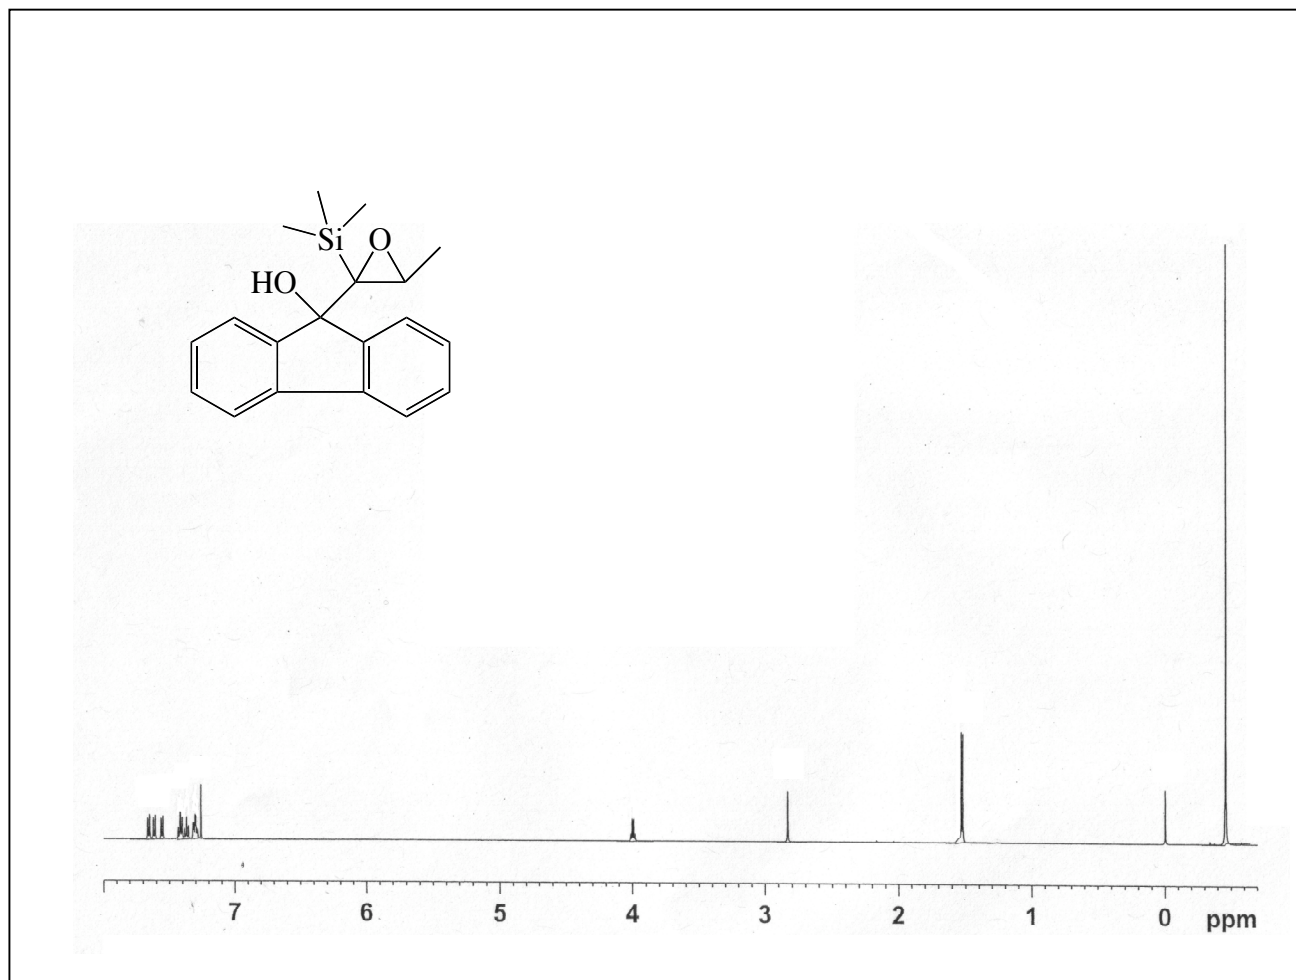



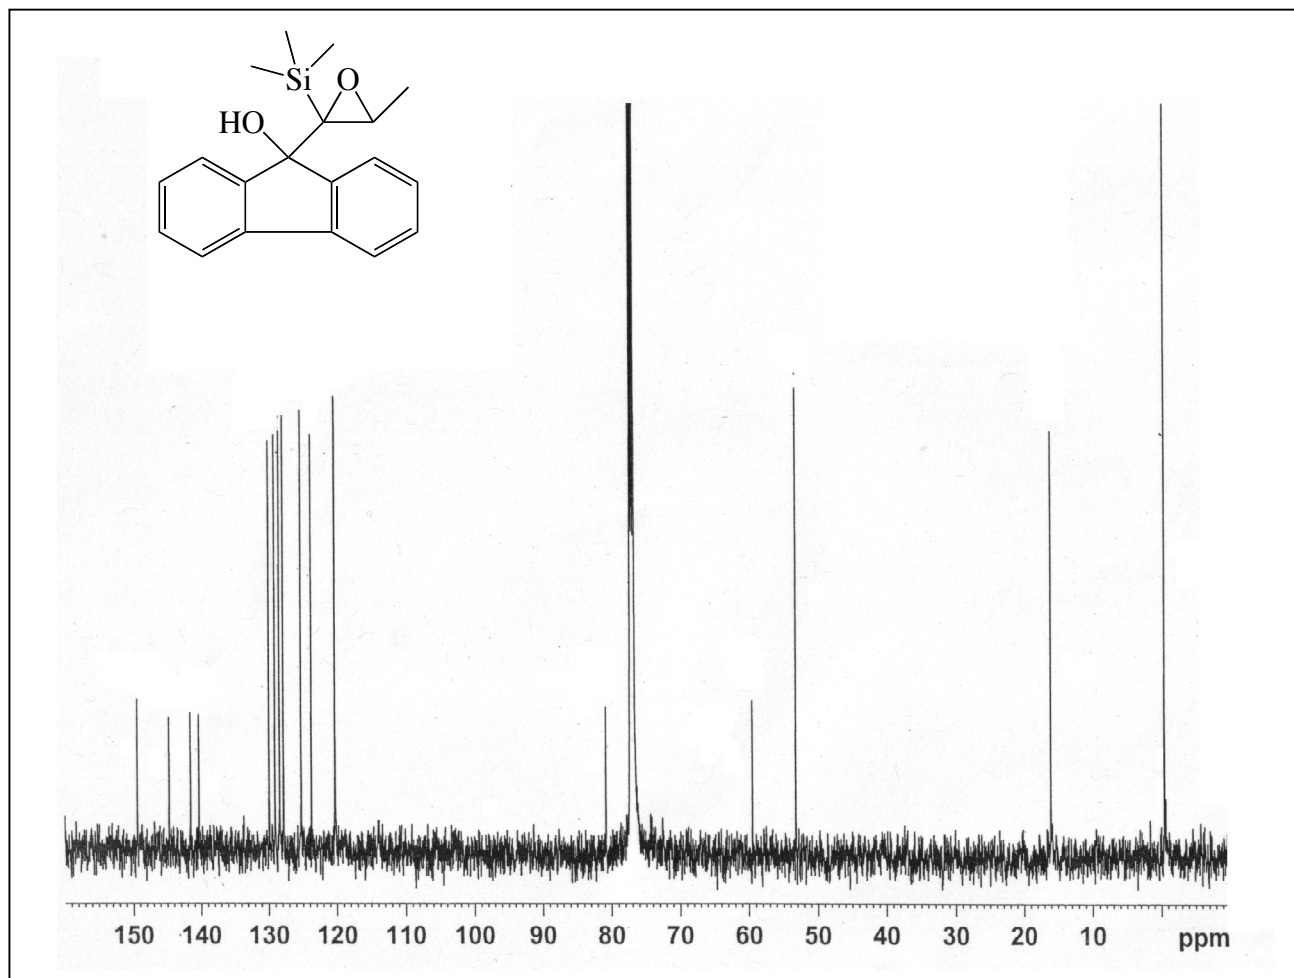

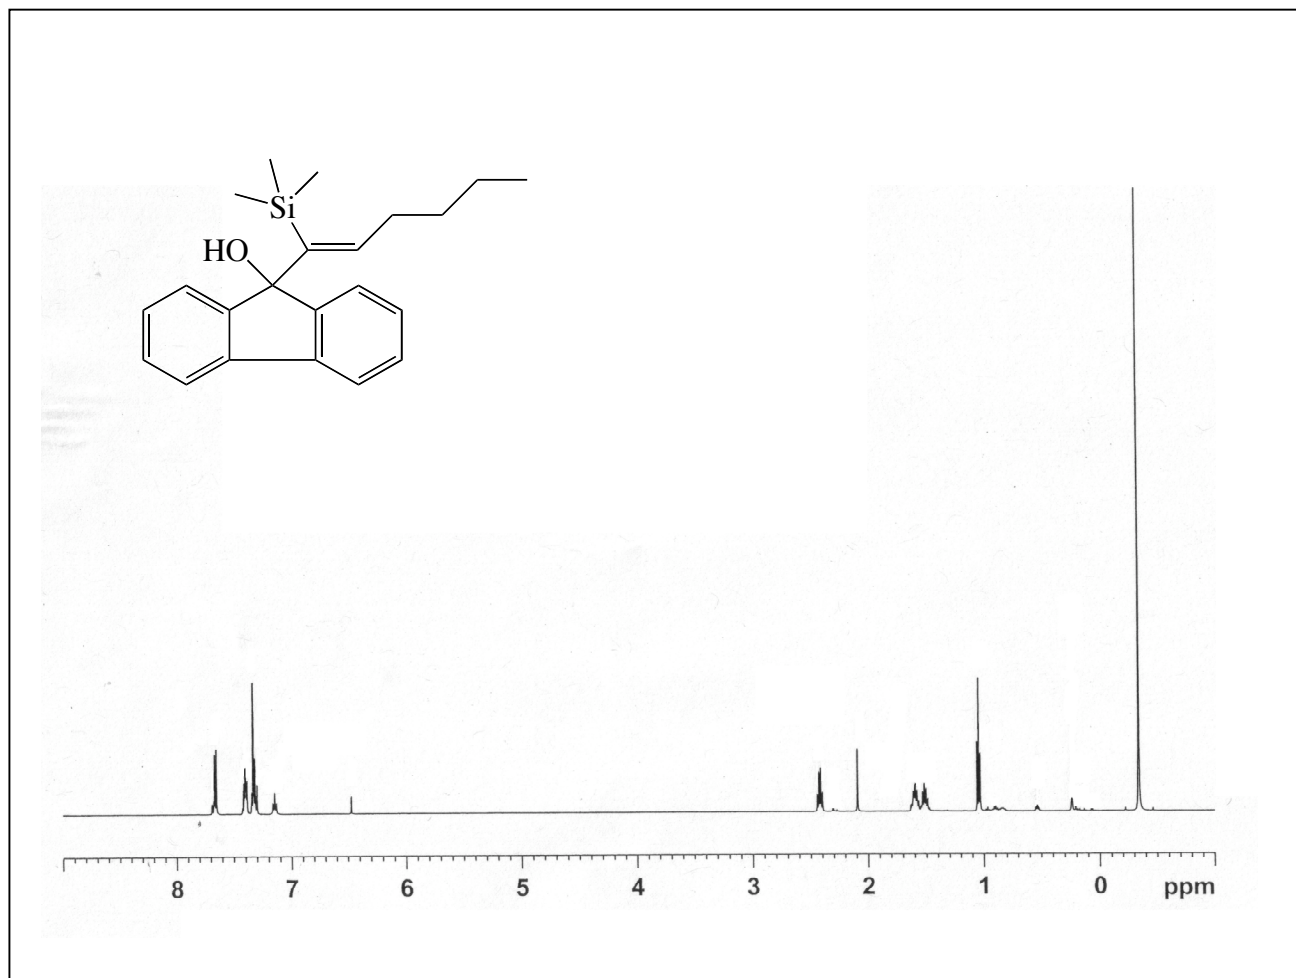

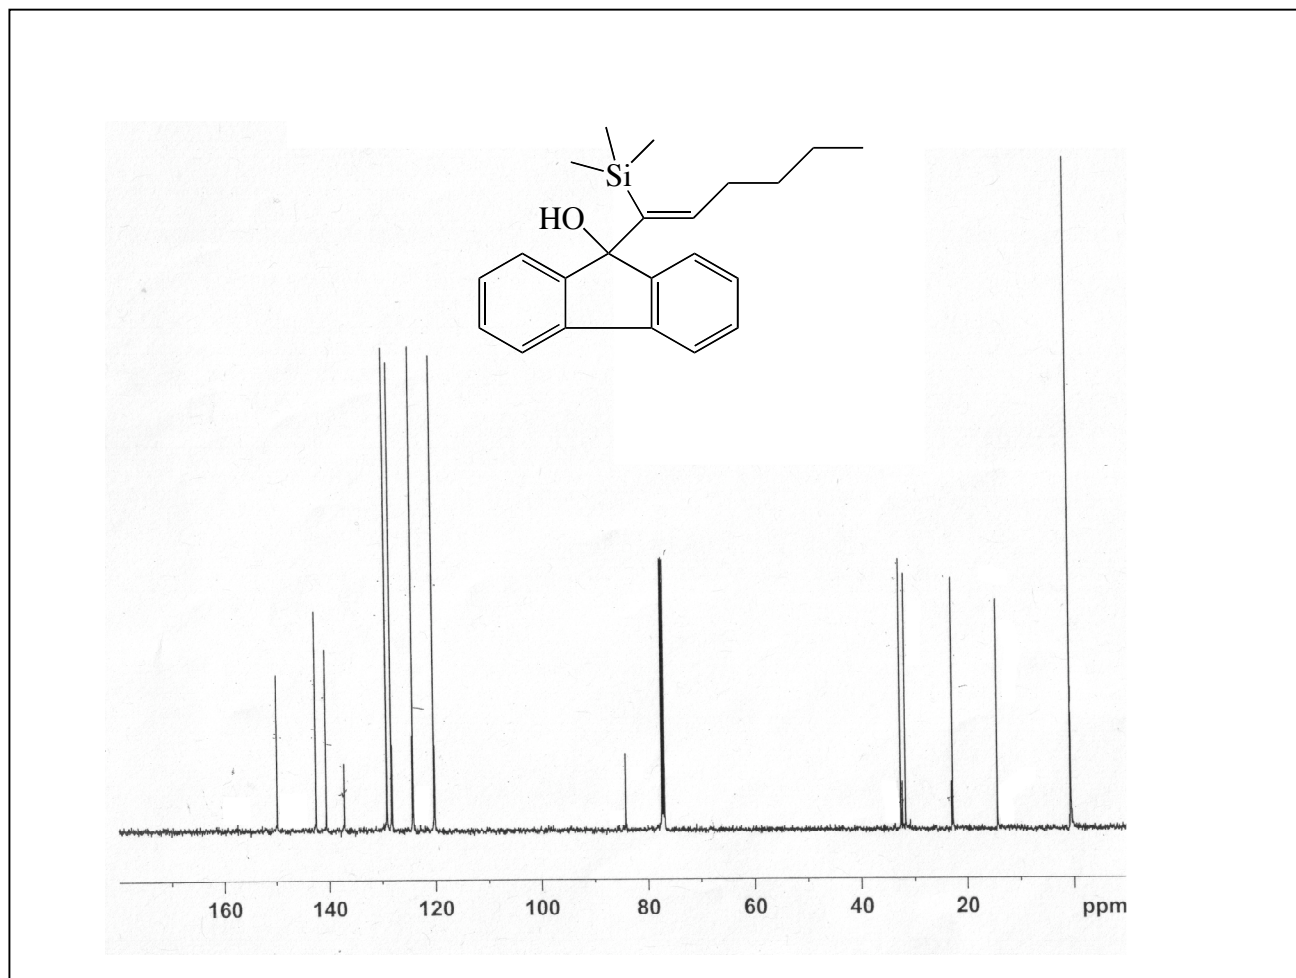

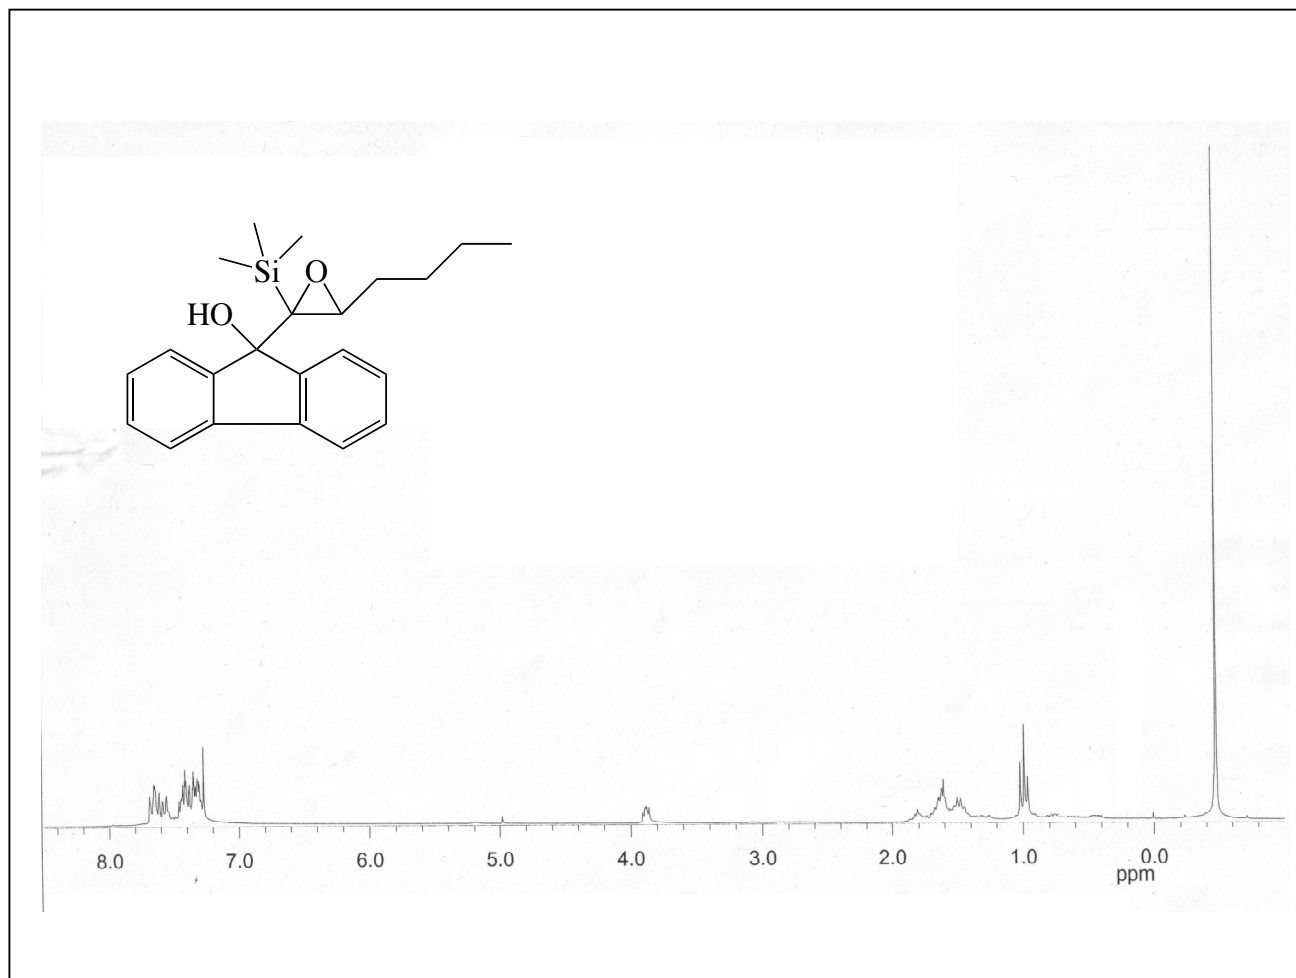

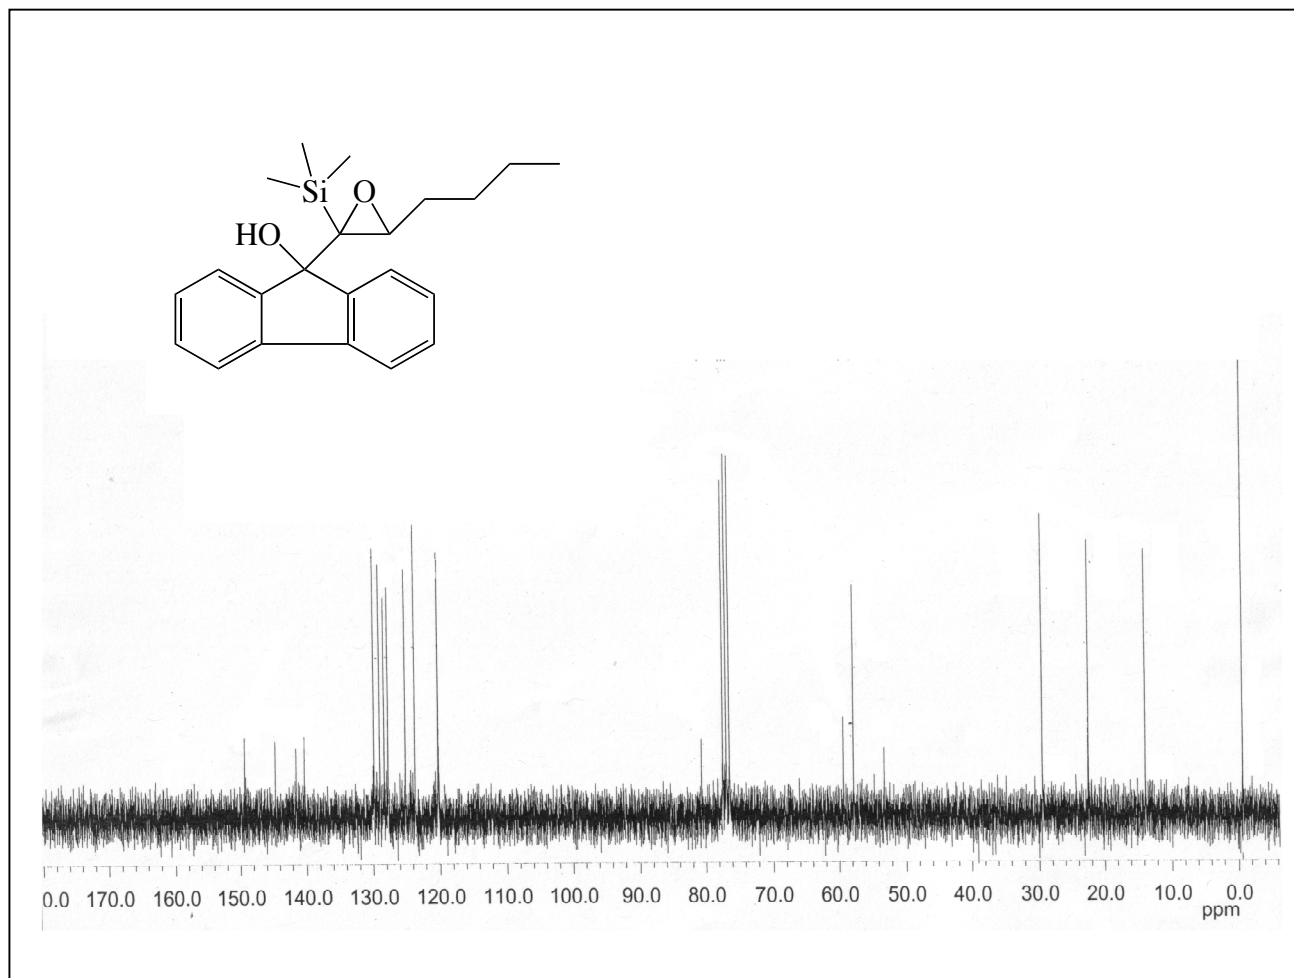



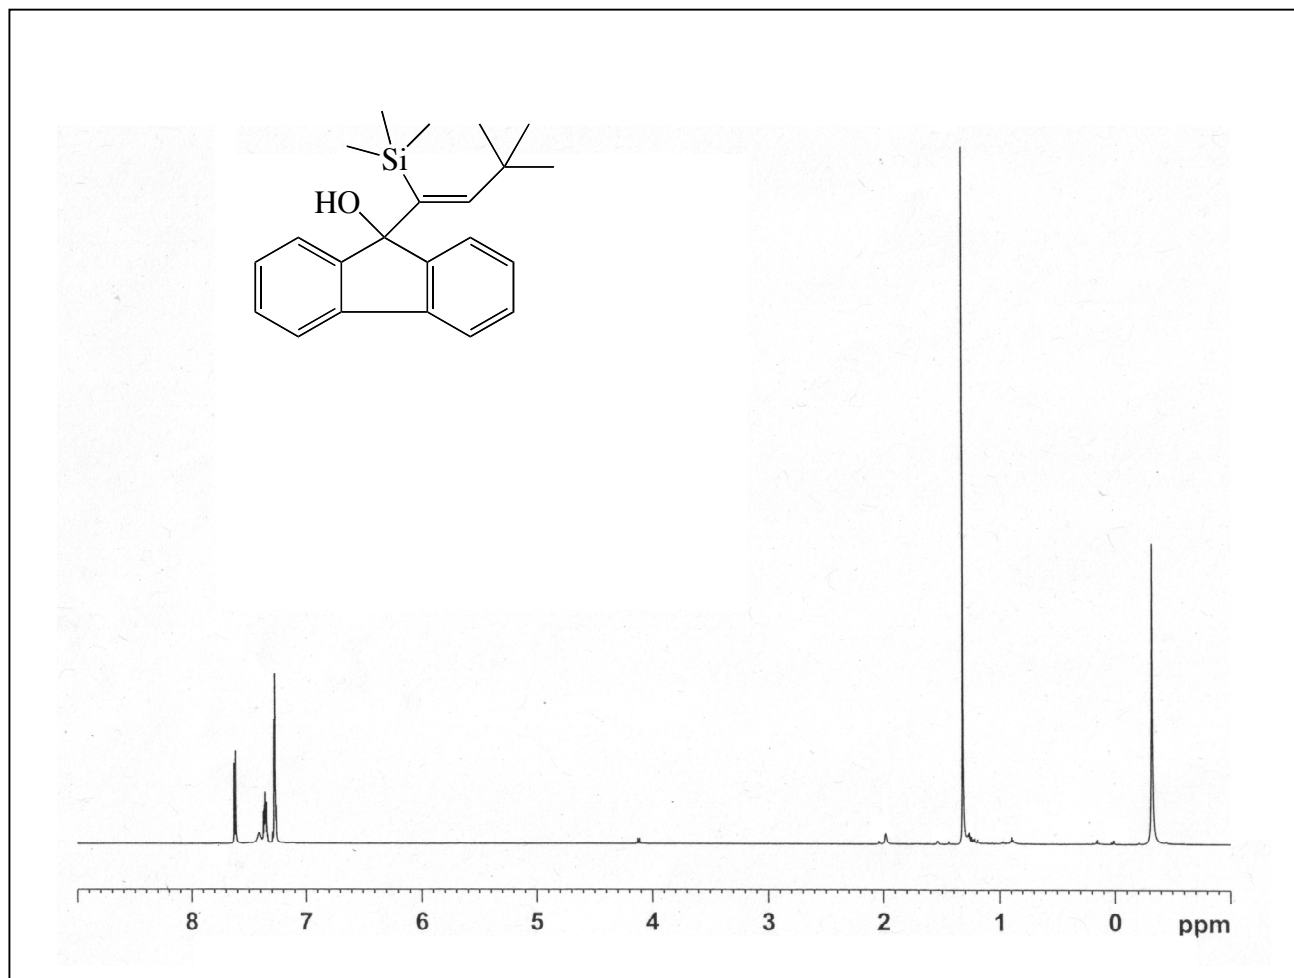

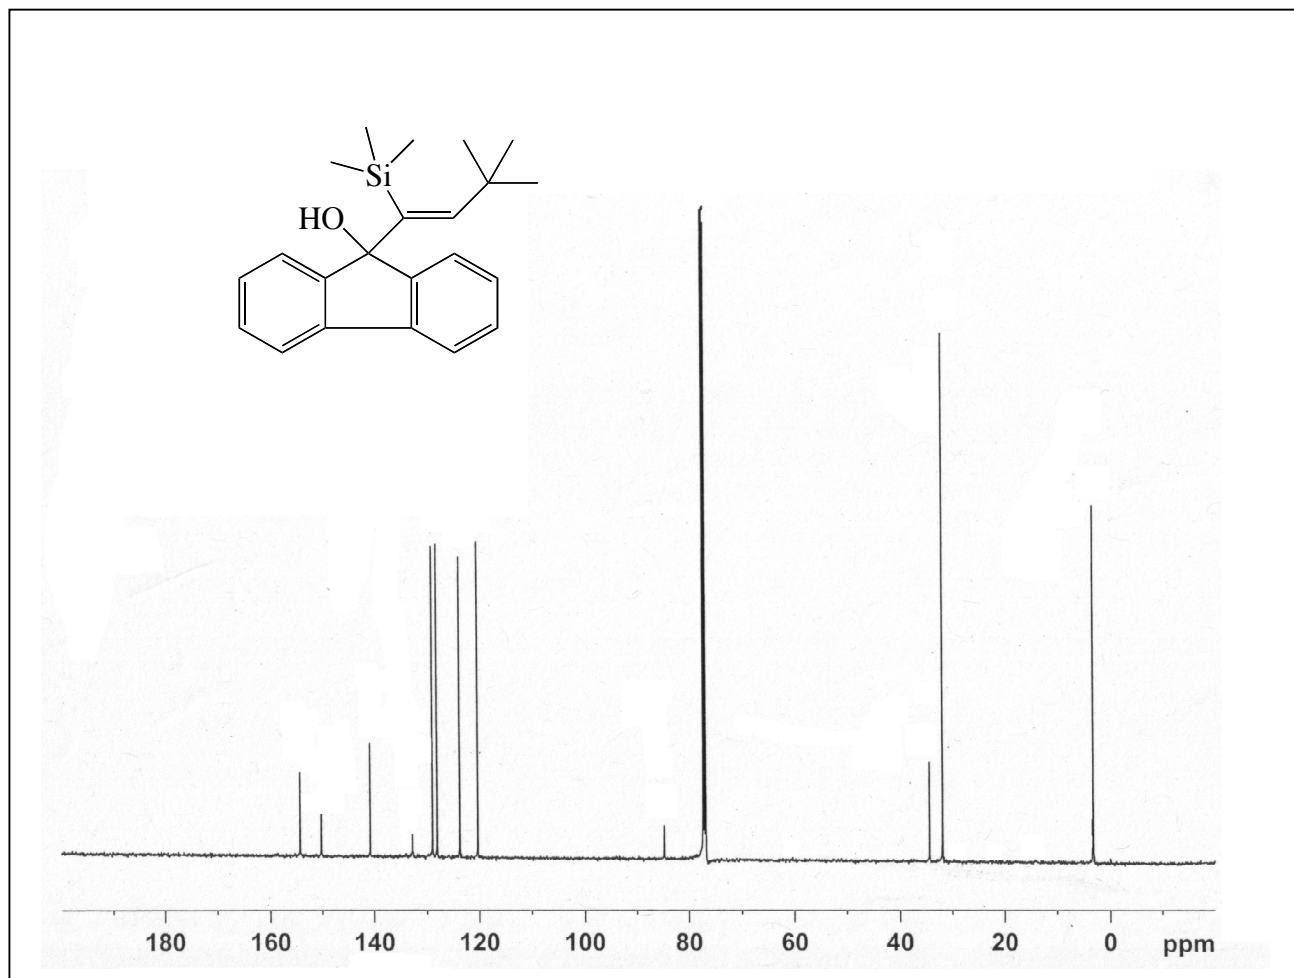



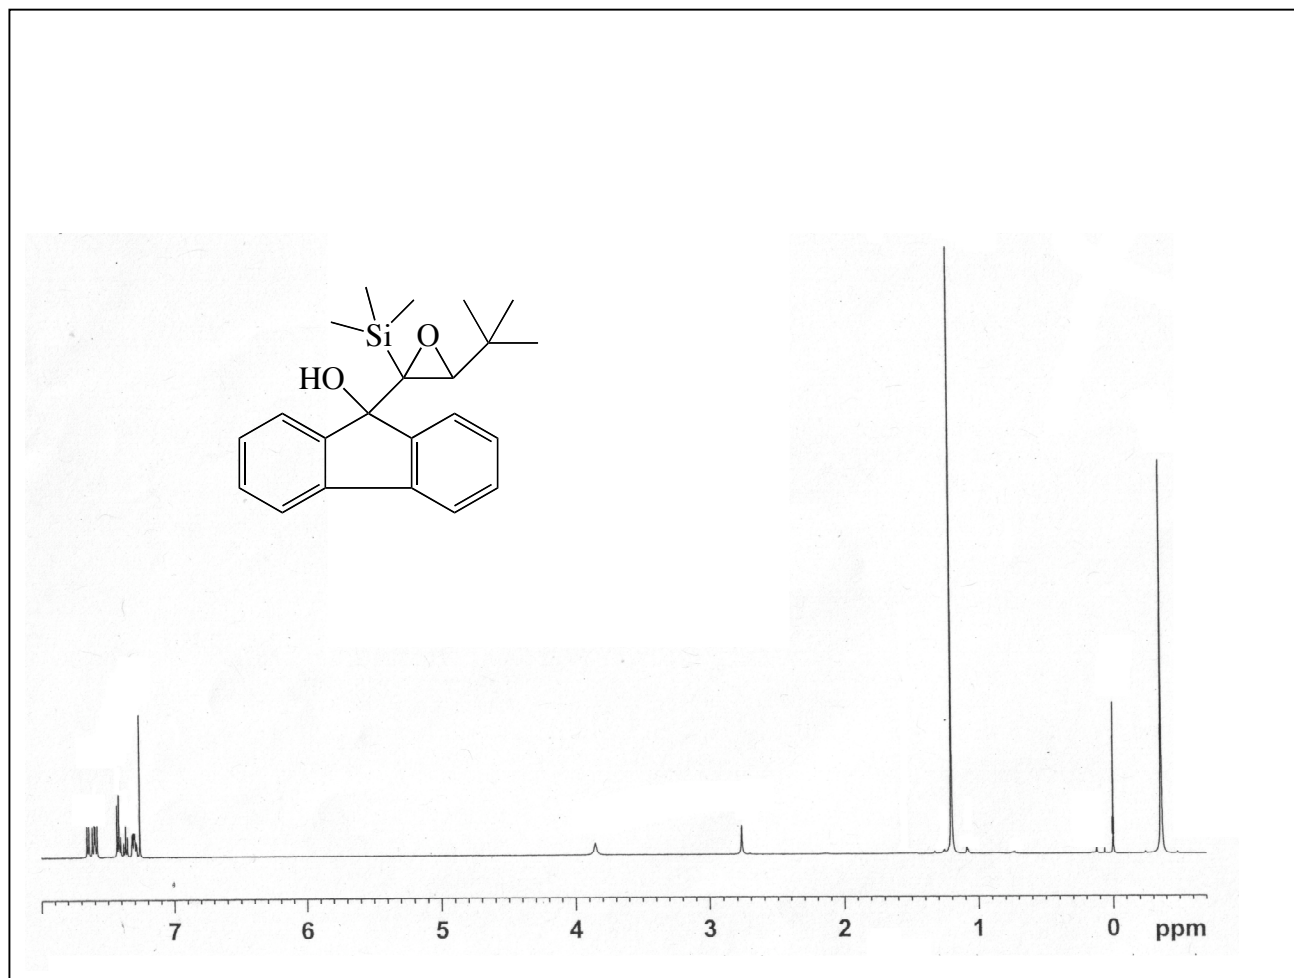

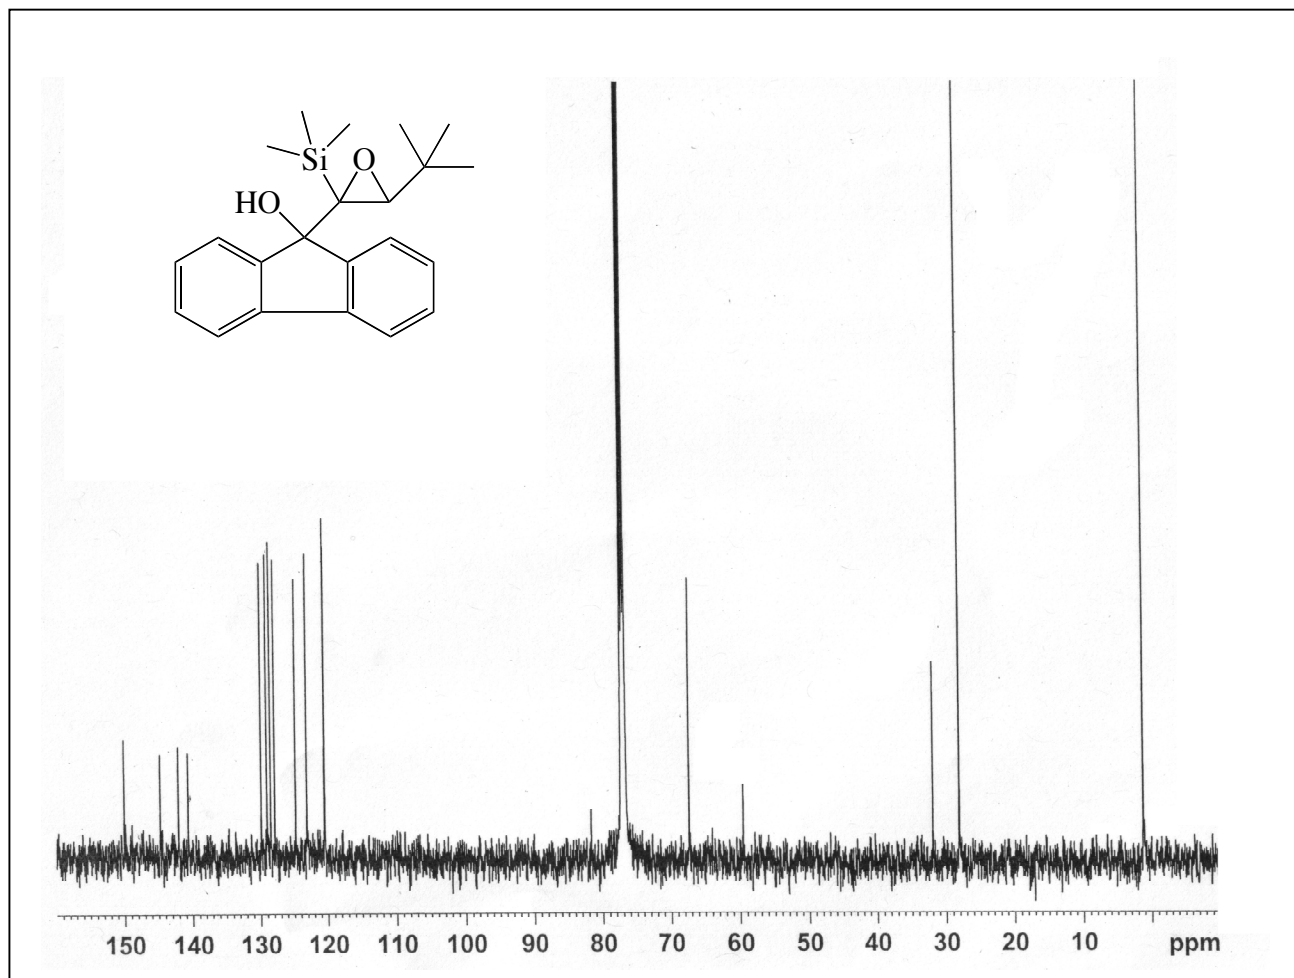

Supplement: b910887d.pdf [file b910887d.pdf]
